# Supplementary material for: Optimization of selective pressurized liquid extraction and ultrasonication-assisted QuEChERS methods for the determination of polybrominated diphenyl ethers in sediments
Source: Royal Society of Chemistry journal article supplement (doi:10.1039/c5ay02099a), 2015-01-01
Supplement: c5ay02099a1.pdf [file c5ay02099a1.pdf]

On the basis of former reports<sup>1</sup>, modifications of QuEChERS method on mobile phase system and extraction procedures were as follows:

The mobile phase system used in QuEChERS was a mixture of hexane and dichloromethane which has been approved practicable for PBDEs extraction and elution from various solids<sup>2-5</sup>. The mobile phase system was optimized at three gradients: hexane: dichloromethane=25:75, 50:50, and 75:25. To achieve the purpose of raising recoveries and elimination co-elutes, 50:50 was applied for the extraction solvent composition. For extraction procedure, labelled standards were spiked for each parameter optimization. Extraction time was optimized at 3, 5 and 7 min each cycle for total 3 cycles. Results showed extension of extraction time could not improve extraction efficiency. Five min/cycle for 3 cycles provided satisfying method performances.

## References

1. R. Perez-Burgos, E. M. Grzelak, G. Gokce, J. Saurina, J. Barbosa and D. Barron, *Journal of chromatography. B, Analytical technologies in the biomedical and life sciences*, 2012, 899, 57-65.
2. A. R. Fontana, A. Camargo, L. D. Martinez and J. C. Altamirano, *Journal of chromatography. A*, 2011, 1218, 2490-2496.
3. M. Gorga, E. Martinez, A. Ginebreda, E. Eljarrat and D. Barcelo, *Sci Total Environ*, 2013, 444, 51-59.
4. X. Peng, C. Tang, Y. Yu, J. Tan, Q. Huang, J. Wu, S. Chen and B. Mai, *Environ Int*, 2009, 35, 303-309.
5. J. Lv, Y. Zhang, X. Zhao, C. Zhou, C. Guo, Y. Luo, W. Meng, G. Zou and J. Xu, *Environmental science and pollution research international*, 2015, 22, 4256-4264.

**Table S1** Reference Mass Fraction Values for Selected PBDEs in SRM 1944 & 2585.

| Chemicals | Mass Fractions (ng/g Dry Mass Basis, d.w.) |          |
|-----------|--------------------------------------------|----------|
|           | SRM 1944                                   | SRM 2585 |
| BDE-28    | —                                          | 46.9±4.4 |
| BDE-47    | 1.72±0.28                                  | 497±46   |
| BDE-99    | 1.98±0.26                                  | 892±52   |
| BDE-100   | 0.447±0.027                                | 145±11   |
| BDE-153   | 6.44±0.37                                  | 119±1.0  |
| BDE-154   | 1.06±0.08                                  | 83.5±2.0 |

**Table S2** The optimized MRM parameters for tandem mass spectrometry.

| Compoun<br>ds | MRM<br>transitions(m/z) | Dwell<br>time(s) | Collision(V) | Ion source (°C) | Electron<br>energy (eV) |
|---------------|-------------------------|------------------|--------------|-----------------|-------------------------|
| BDE-28        | 287>121                 | 0.1              | 35           | 280             | -70                     |
|               | 287>135                 |                  | 35           |                 |                         |
| BDE-47        | 483>325                 | 0.1              | 20           |                 |                         |
|               | 325>217                 |                  | 35           |                 |                         |
| BDE-99        | 405>297                 | 0.1              | 35           |                 |                         |
|               | 403>297                 |                  | 35           |                 |                         |
| BDE-100       | 405>297                 | 0.1              | 35           |                 |                         |
|               | 403>297                 |                  | 35           |                 |                         |
| BDE-153       | 483>376                 | 0.1              | 35           |                 |                         |
|               | 643>483                 |                  | 20           |                 |                         |
| BDE-154       | 483>376                 | 0.1              | 35           |                 |                         |
|               | 643>483                 |                  | 20           |                 |                         |

**Table S3** The concentrations of detected PBDEs in 3 sampling locations using ultrasonication-assisted QuEChERS and SPLE. (UA-Q: ultrasonication-assisted QuEChERS; N.D.: Non-detected means a signal-to-noise ratio <10).

| Chemicals | Sample 1  |           | Sample 2  |           | Sample 3  |           |
|-----------|-----------|-----------|-----------|-----------|-----------|-----------|
|           | UA-Q      | SPLE      | UA-Q      | SPLE      | UA-Q      | SPLE      |
| BDE-28    | N.D.      | N.D.      | N.D.      | N.D.      | N.D.      | N.D.      |
| BDE-47    | 11.4±0.50 | 13.6±0.45 | N.D.      | N.D.      | 21.1±0.38 | 24.4±0.31 |
| BDE-99    | 34.2±0.76 | 33.7±0.49 | 1.15±0.05 | 0.95±0.03 | 27.7±0.36 | 28.7±0.53 |
| BDE-100   | 1.56±0.22 | 1.47±0.04 | N.D.      | N.D.      | 0.99±0.08 | 0.86±0.02 |
| BDE-153   | 0.77±0.04 | 0.99±0.03 | N.D.      | N.D.      | 2.02±0.08 | 2.14±0.31 |
| BDE-154   | N.D.      | N.D.      | N.D.      | N.D.      | N.D.      | N.D.      |

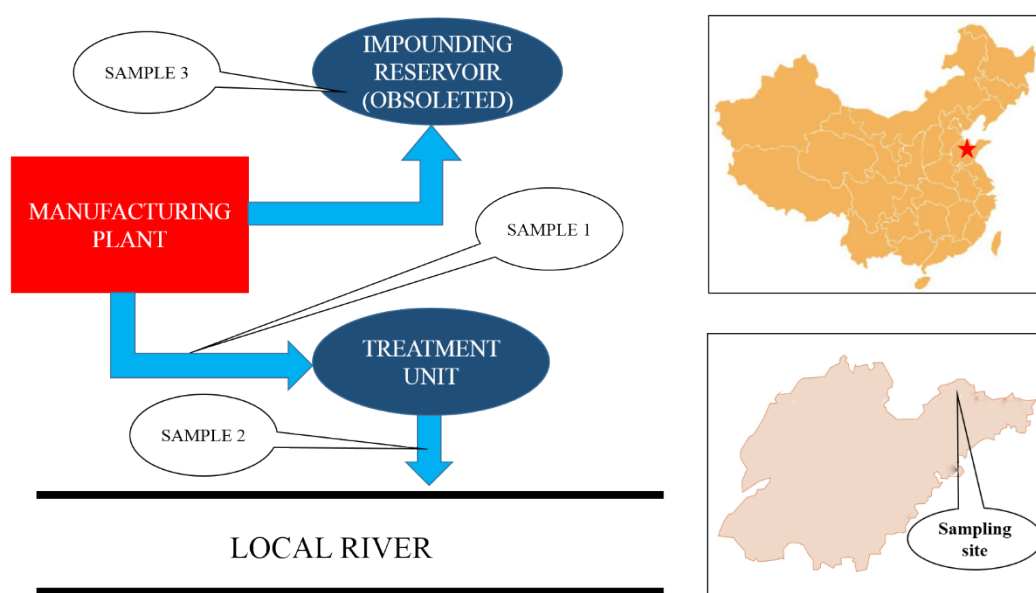

**Figure S1** The sampling positions and detailed information. (Sample 1&2 were collected from canals in use; Sample 3 were collected from an impounding reservoir which was abandoned several years ago).
